# Supplementary material for: Real-Time Optimization of Piezoelectric Energy Harvesting Using ANN-Based Maximum Power Point Tracking
Source: Research Square preprint supplement (doi:10.21203/rs.3.rs-8423366/v1), 2026-01-07
Supplement: Supplementary file 1 [file 2d97e624e7b702485305b281.xlsx]

## Sheet: Sheet1
ampltude data T1	pulse T1	piezo voltage T1	rectifier voltage T1	buck voltage T1	battery mAh T1	pulse ANN T1	piezo voltage ANN T1	rectifier voltage ANN T1	buck voltage ANN T1	battery mAh ANN T1			ampltude data T2	pulse T2	piezo voltage T2	rectifier voltage T2	buck voltage T2	battery mAh T2	pulse ANN T2	piezo voltage ANN T2	rectiter voltage ANN T2	buck voltage ANN T2	battery mAh ANN T2			ampltude data T3	pulse T3	piezo voltage T3	rectifier voltage T3	buck voltage T3	battery mAh T3	pulse ANN T3	piezo voltage ANN T3	rectifier voltage ANN T3	buck voltage ANN T3	battery mAH ANN T3			ampltude data T4	pulse T4	piezo voltage T4	rectifier voltage T4	buck voltage T4	battery mAh T4	pulse ANN T4	piezo voltage ANN T4	rectifier voltage ANN T4	buck voltage ANN T4	battery mAH ANN T4
0	5	0	3.45673e-27	3.45673e-15	800	4.39359	0	3.45673e-27	3.45673e-15	800			-4.36254	5	0	5.72889e-14	0.0572889	800	7.70577	0	5.72889e-14	0.0572889	800			-7.18271	5	0	5.72889e-14	0.0572889	800	9.38834	0	5.72889e-14	0.0572889	800			-5.70588	5	0	7.38159e-14	0.0738159	800	7.61529	0	7.38159e-14	0.0738159	800
0.757071	5	2.43043e-26	5.22449e-09	5.36784e-09	800	4.39359	3.13632e-18	5.33199e-09	5.33175e-09	800			-4.83708	5	19.5553	19.0907	11.3358	800.011	11.7515	11.886	11.3367	11.3328	800.009			-8.90407	5	-12.8552	12.6961	11.2718	800	11.2229	-11.4245	11.2735	11.2668	800			-4.48807	5	19.7824	19.1449	11.346	800.016	11.2179	12.0924	11.327	11.3417	800.013
0.9908	5	-10.5734	10.4419	9.54848	800	10.4357	-10.1922	10.0678	10.0673	800			-5.63565	5	-16.8148	16.4988	11.3143	800.02	11.304	-11.7296	11.3338	11.3192	800.017			-3.07463	5	12.1406	12.0219	11.2547	800.001	11.4012	11.4095	11.2586	11.2695	800.002			-6.42739	5	-19.7581	19.1626	11.3442	800.036	11.2278	-12.0264	11.366	11.338	800.029
-0.684258	5	4.99624	8.97012	9.11555	799.999	10.711	6.14212	9.71773	9.71383	799.999			-5.49931	5	16.049	15.7614	11.3088	800.029	11.4168	11.5582	11.2847	11.3012	800.026			-3.17063	5	-11.4471	11.3785	11.2148	800.002	11.2204	-11.3244	11.2261	11.2192	800.002			-6.67856	5	19.7336	19.1328	11.3446	800.06	11.2034	11.9911	11.3207	11.3385	800.05
1.38625	5	14.1901	13.971	11.2916	800.002	11.2212	11.4665	11.2783	11.2809	800.002			-5.41727	5	-13.661	13.4706	11.2844	800.036	11.1536	-11.4471	11.2543	11.2837	800.034			-7.07222	5	14.3327	14.1087	11.2931	800.006	11.3935	11.5238	11.2749	11.2965	800.006			-5.68595	5	-18.6473	18.2805	11.3266	800.08	11.2013	-11.6847	11.2748	11.3211	800.067
-1.87828	5	-17.5535	17.2095	11.3193	800.011	10.7108	-11.7029	11.2937	11.3209	800.01			-5.15049	5	10.0877	11.0968	11.1946	800.041	10.5306	7.5386	11.1706	11.1943	800.04			-5.86527	5	-17.5398	17.1966	11.3192	800.015	11.229	-11.6488	11.3158	11.3108	800.015			-5.49395	5	11.6913	11.6308	11.2441	800.095	11.0922	11.4001	11.2665	11.2572	800.082
-0.366718	5	19.6723	19.133	11.3414	800.029	11.2474	11.9363	11.3546	11.3346	800.025			-6.09426	5	-2.76797	10.8584	11.0409	800.044	7.7978	-0.464959	11.0467	11.0504	800.046			-3.38135	5	19.692	19.1469	11.3417	800.033	11.3552	12.0499	11.3475	11.3397	800.031			-7.34935	5	11.1267	11.0414	11.0603	800.107	11.0474	11.2075	11.1554	11.1076	800.095
-1.7083	5	-19.6353	19.0895	11.3417	800.05	10.7774	-11.9076	11.3075	11.3356	800.043			-4.27401	5	11.0151	11.0798	11.1842	800.046	12.2854	4.44162	11.0887	11.092	800.05			-5.5652	5	-19.6011	19.0828	11.3401	800.054	11.2351	-11.8672	11.3128	11.3332	800.049			-6.07177	5	4.42304	10.9645	11.1409	800.118	11.0069	-7.48813	11.1272	11.1045	800.107
-1.24202	5	19.6301	19.1278	11.3389	800.072	11.2496	11.9893	11.333	11.338	800.063			-4.61988	5	-13.9735	13.7665	11.2882	800.051	11.123	-11.3775	11.2584	11.2509	800.055			-5.81214	5	19.5946	19.097	11.3385	800.075	11.3664	11.8967	11.3046	11.3353	800.068			-4.79478	5	-6.77555	10.9799	11.1536	800.127	11.032	11.144	11.0842	11.0782	800.118
-2.06538	5	-17.5239	17.1854	11.3193	800.091	10.7044	-11.6824	11.3245	11.3144	800.081			-5.18531	5	12.8411	12.6876	11.2722	800.055	11.2694	11.4007	11.2539	11.2685	800.06			-4.92339	5	-17.3169	16.9838	11.3179	800.095	11.2309	-11.7159	11.3311	11.3179	800.086			-5.01516	5	-16.3258	16.0259	11.3109	800.136	11.2021	-11.694	11.2859	11.3213	800.13
-2.09903	5	14.785	14.5606	11.2989	800.11	11.2211	11.4649	11.2595	11.2869	800.099			-8.04023	5	0.656693	10.7597	10.9406	800.056	11.3736	11.5132	11.2903	11.2907	800.063			-5.56459	5	14.3189	14.1129	11.2943	800.113	11.401	11.4129	11.2542	11.2732	800.104			-3.57456	5	16.6548	16.3389	11.3132	800.143	11.1633	11.7493	11.2949	11.3256	800.142
-1.32111	5	-3.33817	10.9902	11.1605	800.125	6.41308	1.03989	11.1615	11.1714	800.115			-6.52866	5	15.7287	15.451	11.3063	800.063	11.3632	11.5023	11.2975	11.2849	800.069			-5.13592	5	-0.846967	10.9664	11.1442	800.129	9.58088	5.97912	11.1204	11.1471	800.12			-2.53848	5	-19.4613	19.0467	11.3314	800.154	11.2385	-12.1913	11.3627	11.3437	800.157
-1.21074	5	-16.2265	15.9088	11.3096	800.14	10.703	-11.6778	11.3372	11.3119	800.131			-7.48188	5	-17.0405	16.7167	11.3159	800.072	11.2098	-11.5627	11.3057	11.2975	800.076			-3.16218	5	-16.7531	16.411	11.3133	800.143	11.2343	-11.8368	11.4094	11.3227	800.137			-5.48067	5	15.0327	14.7802	11.3005	800.159	11.1729	11.803	11.349	11.3254	800.168
0.17865	5	18.0027	17.6325	11.322	800.153	11.2398	11.7718	11.3291	11.3245	800.147			-5.16052	5	16.5309	16.2261	11.3124	800.082	11.4969	11.6397	11.3055	11.3113	800.084			-4.41803	5	18.2104	17.8297	11.3233	800.156	11.37	11.8489	11.3627	11.3282	800.152			-7.28716	5	13.9393	13.7295	11.2888	800.162	11.1761	-11.4077	11.2675	11.2617	800.17
-2.73942	5	-19.6033	19.0791	11.3404	800.168	10.9645	-12.456	11.3407	11.3499	800.165			-4.40268	5	-18.6844	18.3041	11.3266	800.097	11.3139	-11.7457	11.3367	11.3208	800.096			-6.7015	5	-19.6671	19.1484	11.3402	800.171	11.2502	-12.419	11.3298	11.3495	800.171			-4.43312	5	11.6808	11.5918	11.2328	800.162	11.1347	11.5996	11.3176	11.3026	800.175
-3.49373	5	20.1283	19.2488	11.3536	800.191	11.2701	12.8375	11.3552	11.3579	800.19			-0.930382	5	13.6616	13.4744	11.286	800.106	11.3516	11.4899	11.2645	11.2918	800.105			-3.91569	5	20.1368	19.2568	11.354	800.195	11.3072	12.8377	11.3591	11.3578	800.196			-4.03886	5	-17.4499	17.1095	11.3188	800.17	11.213	-11.8267	11.3429	11.3282	800.186
-5.28683	5	-19.6623	19.1235	11.3415	800.21	11.0101	-12.5969	11.3048	11.3534	800.211			-2.17635	5	-19.1396	18.7424	11.3294	800.122	11.2788	-11.6877	11.282	11.3207	800.119			-2.50286	5	-19.6771	19.1379	11.3416	800.213	11.2518	-12.4858	11.3006	11.3513	800.218			-5.81576	5	14.2869	14.0664	11.293	800.175	11.1466	11.6603	11.3296	11.3107	800.194
-4.85538	5	19.7368	19.1309	11.3452	800.231	11.2681	12.7063	11.3198	11.3555	800.236			-4.01195	5	17.7235	17.3855	11.3206	800.139	11.4294	11.5712	11.293	11.3021	800.133			-6.16958	5	19.7022	19.1098	11.3447	800.234	11.3196	12.5952	11.311	11.3533	800.243			-4.78452	5	12.6924	12.5292	11.2674	800.177	11.4819	5.82776	11.0313	11.0419	800.2
-3.5681	5	-19.5242	19.0703	11.3353	800.251	10.9089	-12.2911	11.3516	11.3465	800.26			-3.28656	5	3.44121	10.9106	11.0934	800.15	10.6804	10.5227	11.075	11.0996	800.144			-4.98618	5	-19.5166	19.0679	11.3349	800.254	11.2468	-12.2865	11.3353	11.3468	800.267			-2.75886	5	-14.4384	14.2074	11.2934	800.181	11.1944	-11.6053	11.3316	11.3006	800.206
-2.79726	5	12.5783	12.4486	11.2688	800.265	11.2286	11.5753	11.2579	11.3095	800.28			-7.41636	5	-16.6803	16.3506	11.313	800.16	11.3203	-11.7558	11.3141	11.3246	800.156			-1.67146	5	12.4636	12.3407	11.2664	800.268	11.3929	11.5324	11.2542	11.303	800.287			-3.07041	5	-11.796	11.6985	11.2398	800.181	8.11566	1.53407	11.0036	10.9966	800.209
0.032274	5	-7.56168	11.0488	11.1874	800.278	10.6333	-11.4388	11.2708	11.2752	800.299			-4.7875	5	20.0265	19.1973	11.3525	800.182	12.1978	12.3032	11.331	11.3471	800.176			-2.48897	5	-7.1233	11.029	11.1798	800.281	11.2227	-11.4133	11.2549	11.2734	800.306			-3.44656	5	11.368	11.3058	11.2051	800.182	10.4422	-2.61747	10.9229	10.9184	800.21
-2.75418	5	-19.6452	19.1698	11.3366	800.292	10.8147	-12.0176	11.3551	11.3387	800.318			-4.64644	5	-20.7152	19.3477	11.3638	800.211	12.3476	-12.8091	11.3581	11.3568	800.202			-6.10195	5	-19.6224	19.1436	11.3382	800.295	11.2383	-11.9795	11.3239	11.3388	800.326			-2.04701	5	6.73665	9.61075	9.76679	800.181	11.0806	11.3489	11.2439	11.24	800.211
-2.28849	5	20.1927	19.3031	11.3541	800.315	11.2698	12.8211	11.408	11.356	800.343			-1.95678	5	20.1218	19.231	11.3543	800.237	12.4491	12.5468	11.3623	11.3512	800.226			-4.66678	5	20.2034	19.2978	11.3548	800.318	11.304	12.9082	11.4271	11.358	800.351			-3.77863	5	-13.3946	13.2104	11.2815	800.184	11.1896	-11.5523	11.2813	11.3012	800.215
-5.88532	5	-20.0509	19.2506	11.3519	800.336	11.1142	-12.9581	11.4121	11.3608	800.368			-3.25646	5	-20.1251	19.1985	11.355	800.269	12.3744	-12.8298	11.3201	11.3592	800.256			-2.28671	5	-20.0647	19.2549	11.3523	800.34	11.2625	-12.9882	11.4175	11.3619	800.376			-5.00973	5	16.0527	15.762	11.309	800.19	11.1627	11.7459	11.318	11.3231	800.223
-6.14207	5	20.5759	19.3002	11.3622	800.368	11.2743	13.2172	11.4127	11.3759	800.402			-1.14404	5	19.9587	19.1543	11.3521	800.301	12.6545	12.7586	11.3338	11.3565	800.287			-3.5661	5	20.5813	19.3006	11.3623	800.372	11.2924	13.2158	11.4029	11.3766	800.41			-3.84143	5	-11.2439	11.2003	11.1976	800.191	11.1794	-11.442	11.2825	11.2697	800.226
-6.27428	5	-19.8574	19.1674	11.3486	800.397	11.1405	-13.064	11.3858	11.3678	800.434			-1.95501	5	-19.629	19.0969	11.3414	800.335	11.4912	-11.9976	11.3339	11.3386	800.32			-4.35041	5	-19.8644	19.1731	11.3487	800.4	11.2638	-13.0644	11.3764	11.3684	800.443			-3.44354	5	-13.1266	12.9516	11.2767	800.193	11.1737	-11.3828	11.2547	11.2617	800.228
-5.14105	5	19.4557	19.0387	11.332	800.422	11.2686	12.7369	11.3804	11.3551	800.464			-2.80021	5	18.0565	17.7255	11.3236	800.368	11.4824	11.6251	11.2735	11.3144	800.352			-2.22512	5	19.454	19.038	11.332	800.426	11.3107	12.7647	11.3779	11.3558	800.473			-4.3498	5	10.1035	10.1391	10.2989	800.193	11.1634	7.26738	10.6475	10.6484	800.228
-2.93006	5	-18.2088	17.854	11.3244	800.446	10.796	-11.9627	11.3311	11.3376	800.494			-2.61252	5	9.4213	10.9841	11.1548	800.396	11.1222	11.2291	11.1497	11.1631	800.381			-3.82694	5	-18.189	17.8356	11.3243	800.45	11.238	-11.9676	11.3324	11.3377	800.504			-1.99871	5	12.0598	11.9449	11.2517	800.194	11.0493	11.2153	11.1731	11.1688	800.229
-3.05342	5	-15.5944	15.2647	11.3035	800.466	11.2166	11.4058	11.236	11.2792	800.52			-2.87281	5	-18.9327	18.5316	11.3283	800.422	11.3892	-11.8599	11.383	11.3273	800.41			-4.35644	5	-15.711	15.3776	11.3046	800.47	11.4015	11.4052	11.2352	11.2794	800.53			0.240082	5	-16.5425	16.2342	11.3126	800.201	11.1987	-11.6545	11.3024	11.3141	800.234
-2.75654	5	19.7556	19.3032	11.3353	800.485	11.2464	11.9123	11.3912	11.3314	800.544			-4.10874	5	19.9431	19.3216	11.3458	800.449	12.3251	12.425	11.3931	11.3487	800.439			-2.38512	5	19.7479	19.2927	11.3366	800.489	11.365	11.9154	11.3886	11.3321	800.554			-2.21003	5	-10.5664	10.533	10.681	800.202	11.121	-10.8445	10.7588	10.7469	800.236
-4.36844	5	-19.6984	19.1397	11.3438	800.503	10.958	-12.4365	11.352	11.3502	800.568			-4.96988	5	-19.7799	19.0802	11.3491	800.47	12.4639	-12.8981	11.3433	11.3614	800.465			-2.05546	5	-19.6785	19.1165	11.3439	800.507	11.2509	-12.4476	11.3423	11.3506	800.579			-1.10875	5	16.832	16.5119	11.3145	800.209	11.1446	11.6496	11.2891	11.3154	800.242
-5.16052	5	19.9283	19.1811	11.3503	800.525	11.2682	12.7083	11.3353	11.3556	800.596			-5.23076	5	20.0152	19.1767	11.3538	800.492	12.8121	12.9316	11.3156	11.3644	800.493			-4.3172	5	19.9424	19.19	11.3504	800.529	11.312	12.7369	11.3405	11.3562	800.607			0.221365	5	-17.5999	17.2543	11.3199	800.217	11.2065	-11.7457	11.3032	11.3247	800.25
-5.6693	5	-19.6375	19.1021	11.342	800.541	11.0833	-12.843	11.3136	11.3605	800.62			-6.16214	5	-19.8798	19.1848	11.349	800.511	12.49	-12.9177	11.3125	11.364	800.52			-4.47901	5	-19.6393	19.1014	11.342	800.545	11.26	-12.8552	11.3145	11.361	800.632			-3.93441	5	12.1879	12.0697	11.2573	800.22	11.1122	11.4914	11.2954	11.2826	800.254
-5.62326	5	19.581	19.0942	11.3384	800.556	11.2704	12.8583	11.3178	11.361	800.645			-6.315	5	19.8513	19.1635	11.3489	800.531	12.7922	12.9092	11.3139	11.3635	800.548			-2.85365	5	19.5852	19.0965	11.3387	800.56	11.3058	12.8666	11.3148	11.3615	800.657			-5.23192	5	19.4845	19.0577	11.3328	800.231	11.1597	11.7296	11.3404	11.3186	800.263
-5.57073	5	-18.7428	18.3628	11.3277	800.569	11.0619	-12.7675	11.3094	11.358	800.669			-6.73819	5	-19.547	19.0745	11.3375	800.548	12.2201	-12.7086	11.3059	11.3563	800.573			-3.06135	5	-18.793	18.4113	11.328	800.573	11.2585	-12.7817	11.3076	11.3585	800.681			-0.652295	5	-14.6802	14.4415	11.2963	800.236	11.1913	-11.5708	11.2876	11.3034	800.266
-4.37139	5	15.2113	14.9569	11.303	800.578	11.262	12.393	11.3035	11.3503	800.692			-4.75799	5	18.5699	18.1945	11.3265	800.563	12.1639	12.2712	11.3178	11.3474	800.598			-0.861804	5	15.2472	14.9915	11.3033	800.583	11.33	12.4194	11.302	11.3508	800.704			-0.754333	5	-18.1661	17.7987	11.3234	800.244	11.1985	-11.6517	11.3206	11.3109	800.274
-3.04457	5	-15.0106	14.7645	11.3002	800.589	10.8916	-12.2408	11.3501	11.3461	800.715			-6.24418	5	-19.2152	18.8202	11.3307	800.58	11.3705	-11.8327	11.3212	11.3311	800.625			-0.909502	5	-15.0243	14.7777	11.3004	800.593	11.2462	-12.2653	11.3485	11.3467	800.728			-2.74195	5	16.4105	16.1069	11.3117	800.251	11.1261	11.5577	11.2852	11.3014	800.28
-3.10182	5	-9.79668	10.8272	11.0095	800.595	11.2273	11.5545	11.2571	11.307	800.734			-4.60748	5	17.8799	17.5356	11.3224	800.598	11.5492	11.6916	11.2716	11.3231	800.652			-4.07629	5	-9.72273	10.8288	11.0111	800.6	11.3909	11.561	11.2573	11.3081	800.747			0.265441	5	1.01457	10.702	10.882	800.253	9.28076	-1.57363	10.9738	10.9796	800.282
-3.30899	5	13.2373	13.0572	11.2795	800.6	4.93186	-0.412414	11.2224	11.2016	800.751			-3.49255	5	-17.1177	16.7924	11.3174	800.618	11.1486	-11.4362	11.2739	11.2734	800.679			-4.16324	5	13.2568	13.076	11.2799	800.605	9.6506	-0.214369	11.2264	11.2023	800.765			2.8357	5	-18.2013	17.8326	11.3237	800.262	11.2106	-11.7962	11.3382	11.3261	800.29
-3.54567	5	-13.7497	13.5508	11.2861	800.603	10.7285	-11.7587	11.3211	11.3244	800.767			-4.89138	5	2.278	10.975	11.1506	800.633	11.3741	-11.8379	11.3617	11.3282	800.704			-1.80188	5	-13.7835	13.5831	11.2865	800.608	11.2322	-11.7627	11.3213	11.3249	800.781			-0.748899	5	6.01043	10.5419	10.7145	800.262	10.985	10.9538	10.9643	10.9966	800.29
-2.25072	5	13.4569	13.2665	11.2829	800.606	11.2505	12.0133	11.3477	11.3396	800.784			-6.86922	5	18.9138	18.5164	11.3286	800.647	12.1823	12.2885	11.3041	11.3485	800.731			-2.09471	5	13.4958	13.3036	11.2835	800.611	11.3568	12.0272	11.3482	11.3402	800.798			-3.27992	5	18.8589	18.4689	11.3278	800.272	11.1661	11.7647	11.3466	11.322	800.298
-5.44088	5	-15.5297	15.2565	11.3047	800.611	10.8196	-12.0319	11.3446	11.3403	800.802			-9.0442	5	-14.3644	14.1388	11.2935	800.656	11.7759	-12.3156	11.3896	11.3467	800.753			-3.70678	5	-15.5738	15.299	11.3051	800.616	11.2403	-12.0509	11.346	11.3409	800.817			-0.79237	5	-10.0606	10.9202	11.1034	800.273	11.0869	-10.4609	11.1427	11.15	800.299
-2.95308	5	19.5856	19.0916	11.3393	800.626	11.2715	12.949	11.3459	11.3642	800.828			-10.8898	5	19.6082	19.1275	11.3379	800.67	12.8421	12.9658	11.3514	11.3649	800.781			-1.92505	5	19.588	19.0922	11.3394	800.631	11.3016	12.9645	11.3453	11.365	800.843			-0.398106	5	-16.3887	16.0847	11.3116	800.279	11.2004	-11.6733	11.3318	11.3125	800.304
-3.61413	5	-19.8427	19.1956	11.3475	800.647	11.1412	-13.0668	11.329	11.3721	800.86			-10.2831	5	-15.4115	15.1411	11.3037	800.675	12.3736	-12.8292	11.3769	11.3579	800.802			-0.42105	5	-19.8459	19.1964	11.3476	800.652	11.2641	-13.0808	11.3291	11.3731	800.875			-2.43524	5	13.7649	13.5652	11.287	800.282	11.1237	11.5461	11.3074	11.2939	800.307
-2.09608	5	19.5796	19.0987	11.338	800.668	11.2728	13.0615	11.3706	11.3693	800.892			-9.42962	5	12.6803	12.5302	11.2699	800.677	12.3042	12.4048	11.3795	11.3491	800.821			-1.39916	5	19.5829	19.1008	11.3381	800.673	11.2974	13.0711	11.3732	11.3697	800.908			-1.49214	5	12.9409	12.7786	11.2741	800.284	11.0965	11.4192	11.2749	11.2628	800.309
-2.96371	5	-19.551	19.074	11.3379	800.69	11.0788	-12.8267	11.3917	11.3576	800.926			-8.09158	5	-13.6353	13.44	11.2845	800.679	11.6317	-12.1643	11.3564	11.3441	800.841			-2.34709	5	-19.5542	19.0764	11.338	800.695	11.2598	-12.8452	11.3912	11.3581	800.942			1.67767	5	-14.0395	13.8265	11.2892	800.287	11.1804	-11.4533	11.2692	11.2808	800.312
-2.80139	5	17.6039	17.2599	11.3205	800.711	11.2544	12.1229	11.3424	11.3435	800.96			-6.03406	5	-10.6752	10.623	10.6257	800.679	11.6968	11.8342	11.345	11.3297	800.856			-1.0858	5	17.6156	17.2711	11.3206	800.716	11.3491	12.1355	11.3416	11.3439	800.976			-0.152974	5	-15.1615	14.9033	11.3009	800.291	11.1903	-11.5597	11.2813	11.3027	800.316
-3.26826	5	-12.939	12.7921	11.2762	800.729	10.6637	-11.5471	11.269	11.3037	800.991			-7.5893	5	-14.6309	14.3938	11.2965	800.683	11.3235	-11.7609	11.292	11.3281	800.873			-0.649276	5	-12.9384	12.7916	11.2761	800.734	11.2263	-11.5496	11.2667	11.3047	801.007			1.12099	5	17.9835	17.6247	11.3224	800.3	11.1667	11.7678	11.3161	11.3257	800.324
-1.97685	5	-0.304158	10.9627	11.1415	800.745	11.404	-3.62692	11.2183	11.1775	801.02			-9.52996	5	16.636	16.3246	11.314	800.69	11.5082	11.6509	11.2989	11.315	800.892			-1.25848	5	-0.403541	10.9624	11.1413	800.75	11.1602	-3.30603	11.2287	11.1778	801.037			0.799176	5	-18.7368	18.3512	11.3271	800.312	11.2102	-11.7914	11.3494	11.3245	800.335
-1.69295	5	6.85789	10.919	11.1003	800.758	11.2445	11.8678	11.3797	11.3294	801.049			-9.41723	5	-3.52411	10.7924	10.9739	800.692	8.36326	2.13024	11.1818	11.1512	800.907			-2.50769	5	7.05652	10.9185	11.0996	800.764	11.3687	11.8654	11.3745	11.3298	801.066			1.1711	5	16.4238	16.123	11.312	800.322	11.1343	11.5976	11.3069	11.3045	800.344
-2.24304	5	-15.4133	15.1322	11.3035	800.771	11.0032	-12.5752	11.4144	11.352	801.077			-13.5771	5	-11.4676	11.3674	10.8271	800.693	11.2498	-11.6371	11.2946	11.314	800.921			-3.10301	5	-15.4384	15.1558	11.3037	800.776	11.2542	-12.5857	11.4089	11.3524	801.095			-0.401125	5	-14.3687	14.1479	11.2933	800.33	11.1847	-11.4985	11.2569	11.2959	800.354
-3.16261	5	19.102	18.6945	11.3299	800.783	11.2725	13.0395	11.4067	11.3663	801.107			-9.6297	5	19.5719	19.1	11.3374	800.706	12.6663	12.7712	11.3443	11.3576	800.943			-0.63237	5	19.1328	18.7243	11.3301	800.789	11.2982	13.0502	11.4108	11.3667	801.125			0.621063	5	15.3009	15.043	11.3034	800.34	11.116	11.5095	11.2696	11.2952	800.364
-6.26247	5	-16.5118	16.203	11.3132	800.791	11.1289	-13.0165	11.4139	11.3647	801.134			-12.8417	5	-20.0723	19.2007	11.3543	800.731	12.7446	-13.1057	11.3685	11.3722	800.975			0.829365	5	-16.5354	16.2257	11.3134	800.796	11.2632	-13.0267	11.4152	11.3651	801.152			0.692912	5	-14.7058	14.4721	11.297	800.35	11.1937	-11.598	11.3102	11.3041	800.375
-3.81776	5	19.6904	19.1338	11.3435	800.807	11.2739	13.1739	11.3585	11.3779	801.169			-10.5481	5	20.6612	19.267	11.3655	800.765	13.0203	13.1767	11.3404	11.3799	801.015			-0.537578	5	19.6918	19.1339	11.3436	800.813	11.2936	13.1791	11.358	11.3785	801.187			-0.539389	5	11.6311	11.5621	11.2381	800.357	10.743	9.69932	11.157	11.1297	800.384
-5.18767	5	-20.0164	19.1831	11.3535	800.83	11.1699	-13.1938	11.3324	11.384	801.209			-9.00702	5	-20.427	19.2824	11.3604	800.803	12.8311	-13.1687	11.3174	11.3821	801.058			-2.25471	5	-20.0201	19.1843	11.3536	800.836	11.2659	-13.1982	11.3332	11.3845	801.228			1.91555	5	14.9776	14.7133	11.2988	800.363	11.1524	11.6905	11.3673	11.3095	800.393
-1.67348	5	20.0375	19.185	11.3542	800.856	11.2745	13.2419	11.3893	11.3826	801.251			-10.7753	5	19.5022	19.0596	11.3353	800.834	12.6545	12.7585	11.2862	11.3591	801.097			-0.527918	5	20.0405	19.1855	11.3542	800.861	11.2914	13.2481	11.3931	11.3829	801.27			2.43661	5	-19.5608	19.1056	11.3356	800.375	11.2277	-12.0246	11.3222	11.3404	800.407
-3.72923	5	-20.2664	19.2305	11.3583	800.889	11.1678	-13.1838	11.375	11.3776	801.3			-10.4082	5	8.39972	10.9677	11.1434	800.859	11.191	-11.5258	11.2543	11.303	801.129			-0.053352	5	-20.2659	19.228	11.3583	800.895	11.2657	-13.1829	11.37	11.378	801.319			0.051101	5	17.5259	17.1808	11.3195	800.383	11.1948	11.935	11.3647	11.3345	800.418
-2.42424	5	20.3092	19.2206	11.3595	800.926	11.2713	12.932	11.2914	11.3671	801.351			-13.3168	5	-18.3797	17.9887	11.3254	800.882	11.0685	-11.2373	11.1452	11.1659	801.159			-0.782106	5	20.3097	19.2196	11.3595	800.932	11.3028	12.9359	11.2911	11.3673	801.371			2.45291	5	-3.08944	10.5408	10.7179	800.384	11.1831	-11.4821	11.2756	11.287	800.422
-4.27401	5	-19.6447	19.1143	11.3423	800.962	10.9441	-12.3948	11.2508	11.3524	801.401			-11.6194	5	20.3728	19.2808	11.3588	800.912	12.6401	12.7432	11.3476	11.3575	801.192			-0.919163	5	-19.6444	19.1137	11.3423	800.968	11.2498	-12.402	11.2561	11.3525	801.421			4.24853	5	-16.1022	15.8082	11.3096	800.389	11.1744	-11.3893	11.2579	11.2612	800.423
-1.10981	5	19.4112	18.9944	11.3331	800.999	11.2344	11.6707	11.3534	11.3102	801.45			-10.6549	5	-20.9587	19.4262	11.3705	800.945	12.6423	-13.0309	11.37	11.3679	801.228			1.19042	5	19.41	18.9939	11.3331	801.005	11.3825	11.6781	11.355	11.3111	801.47			1.38725	5	3.97731	10.6061	10.7832	800.39	11.1726	-11.3714	11.2511	11.2568	800.425
-1.47752	5	-18.2522	17.9068	11.3258	801.038	10.5778	-11.2185	11.1577	11.2585	801.5			-11.9156	5	20.4571	19.2844	11.3613	800.973	12.9181	13.054	11.312	11.373	801.261			-1.37501	5	-18.2397	17.8945	11.3256	801.043	11.2168	-11.174	11.1496	11.2537	801.52			-0.407163	5	17.268	16.9328	11.3177	800.397	11.1681	11.7758	11.3223	11.326	800.433
-0.434003	5	2.27762	11.4566	11.2423	801.073	10.904	-12.2767	11.3208	11.3481	801.548			-8.74024	5	-19.7509	19.1523	11.3461	800.993	12.628	-13.0204	11.3365	11.3695	801.289			-2.28248	5	2.4561	11.4475	11.2419	801.079	11.2471	-12.2993	11.3406	11.3481	801.568			2.17638	5	-11.0573	11.0399	11.1562	800.398	11.1796	-11.4447	11.2723	11.2769	800.436
-2.29085	5	16.0458	15.6795	11.3078	801.105	11.2726	13.0415	11.3574	11.3699	801.596			-10.8037	5	12.645	12.5071	11.2708	801.001	12.4434	12.5412	11.3732	11.3526	801.307			-1.53561	5	16.0999	15.7316	11.3083	801.111	11.298	13.0546	11.3629	11.3702	801.616			2.87736	5	-16.301	15.9999	11.3111	800.404	11.196	-11.6236	11.293	11.3115	800.441
-3.94053	5	-19.518	19.051	11.3341	801.136	11.1471	-13.0922	11.3886	11.3712	801.641			-9.29682	5	15.572	15.2975	11.3064	801.008	11.2787	-11.6876	11.2939	11.3211	801.319			1.11555	5	-19.5541	19.0868	11.3339	801.141	11.2645	-13.104	11.3883	11.3718	801.662			-0.259238	5	12.9081	12.748	11.2738	800.406	11.1019	11.4437	11.2809	11.272	800.443
-6.69039	5	20.2158	19.2982	11.3566	801.168	11.2758	13.3982	11.5015	11.3906	801.69			-10.8745	5	-19.1649	18.7601	11.3308	801.019	11.3226	11.4589	11.2628	11.2864	801.326			0.920535	5	20.2128	19.2918	11.3567	801.174	11.287	13.404	11.5052	11.3911	801.712			1.70061	5	16.2057	15.9083	11.3104	800.412	11.1258	11.556	11.3085	11.296	800.448
-7.16493	5	-20.0235	19.3483	11.3496	801.192	11.1692	-13.1904	11.3535	11.3812	801.732			-8.60094	5	19.5999	19.1142	11.3392	801.033	11.4129	11.5542	11.3202	11.2938	801.333			1.89321	5	-20.0194	19.3414	11.35	801.198	11.2659	-13.1928	11.3529	11.3815	801.754			4.38861	5	-19.3073	18.9027	11.3309	800.423	11.2012	-11.6831	11.2852	11.3203	800.457
-5.24079	5	20.1052	19.1993	11.3559	801.215	11.2745	13.2407	11.3894	11.3831	801.774			-8.58678	5	-19.7498	19.1311	11.347	801.053	11.3815	-11.8488	11.3049	11.3346	801.344			0.267856	5	20.1122	19.2028	11.3559	801.221	11.2918	13.236	11.3826	11.3835	801.796			3.13276	5	9.30953	10.9314	11.103	800.425	10.8362	8.24496	11.0563	11.0504	800.459
-4.09635	5	-20.612	19.2547	11.3651	801.243	11.1799	-13.2412	11.3624	11.3877	801.821			-7.71915	5	19.4953	19.0548	11.3354	801.071	11.7046	11.8416	11.3123	11.3336	801.353			0.798573	5	-20.6159	19.2585	11.3651	801.249	11.2666	-13.2388	11.3586	11.388	801.843			2.55555	5	13.8731	13.6645	11.2883	800.428	11.1123	11.4919	11.2733	11.2903	800.462
-2.26783	5	19.9909	19.2016	11.353	801.264	11.2717	12.9674	11.2633	11.3716	801.862			-6.64789	5	-19.1519	18.7579	11.331	801.088	11.3912	-11.8628	11.3129	11.335	801.364			-0.067238	5	19.9935	19.2035	11.3531	801.27	11.3015	12.9677	11.2667	11.3714	801.885			4.97125	5	-10.9063	10.8554	10.8559	800.428	11.1728	-11.3735	11.2483	11.2603	800.463
-1.89127	5	-20.0681	19.2417	11.3541	801.289	11.1115	-12.9477	11.3087	11.3679	801.905			-5.71593	5	12.1333	12.0307	11.2593	801.1	11.3874	11.5277	11.2803	11.2981	801.371			-0.399918	5	-20.0721	19.2438	11.3542	801.295	11.2618	-12.9503	11.3088	11.3681	801.928			3.11042	5	-15.4819	15.2112	11.3041	800.433	11.1932	-11.5918	11.3134	11.3024	800.467
-2.86632	5	19.5852	19.1049	11.339	801.31	11.2501	12.0021	11.255	11.3443	801.945			-7.01206	5	-8.80006	11.141	11.2094	801.11	11.2476	-11.6332	11.3233	11.3093	801.379			-0.44037	5	19.586	19.1055	11.3391	801.316	11.3594	11.9924	11.253	11.3441	801.968			0.599931	5	18.1082	17.7451	11.3234	800.443	11.1382	11.6173	11.2872	11.3114	800.475
-3.32906	5	-14.1184	13.9185	11.2926	801.325	10.7108	7.46436	11.1437	11.2112	801.981			-6.98727	5	11.3493	11.321	11.2262	801.119	11.5094	11.6522	11.3022	11.3156	801.388			2.79646	5	-14.115	13.9153	11.2926	801.331	9.79883	6.70498	11.1211	11.2113	802.004			1.72053	5	-1.3929	10.7976	10.9791	800.445	9.47075	-1.70931	10.9408	10.938	800.477
-2.30266	5	8.04206	11.1956	11.2183	801.338	10.8229	-12.0414	11.3485	11.3422	802.016			-7.9275	5	10.8694	10.8414	11.0104	801.126	11.1867	-11.517	11.3061	11.2884	801.396			2.37986	5	8.01818	11.1926	11.218	801.344	11.2402	-12.0475	11.3519	11.3425	802.04			3.75223	5	-14.0939	13.8755	11.2899	800.448	11.183	-11.481	11.2897	11.2819	800.48
-2.44608	5	-4.74955	10.9759	11.1517	801.35	11.2681	12.7056	11.3602	11.3574	802.051			-7.68196	5	-0.871277	10.8643	11.0467	801.131	11.3156	11.4514	11.2587	11.2858	801.403			0.360837	5	-4.68573	10.9753	11.1512	801.356	11.3123	12.7321	11.3586	11.358	802.075			3.16778	5	-12.0538	11.9404	11.2522	800.449	11.1716	-11.3604	11.2469	11.2398	800.481
-2.90822	5	-14.0539	13.7986	11.2855	801.359	11.1366	-13.0479	11.4262	11.3671	802.085			-7.52555	5	11.1826	11.0777	10.9172	801.135	12.5757	-7.0438	11.1242	11.107	801.41			0.308309	5	-14.0918	13.8354	11.2867	801.365	11.2639	-13.0679	11.4312	11.3678	802.11			3.82046	5	12.1932	12.0716	11.2571	800.45	11.0846	11.3662	11.2519	11.2432	800.482
-1.67584	5	16.1485	15.8547	11.3115	801.368	11.2743	13.2188	11.444	11.3763	802.121			-7.20329	5	-13.4138	13.2264	11.283	801.137	11.2141	-11.5711	11.3145	11.2983	801.415			3.08385	5	16.1532	15.8593	11.3115	801.374	11.292	13.2304	11.4455	11.377	802.145			5.70484	5	-12.4382	12.3028	11.2641	800.452	11.1745	-11.3911	11.2639	11.2539	800.484
-4.52249	5	-19.2244	18.8192	11.3317	801.379	11.1916	-13.2995	11.4449	11.3842	802.158			-5.76314	5	11.9752	11.8538	11.2156	801.138	11.2884	11.4217	11.2532	11.279	801.42			1.41442	5	-19.2346	18.829	11.3318	801.385	11.2675	-13.3027	11.4443	11.3848	802.183			5.70363	5	-13.6349	13.4382	11.2841	800.455	11.1806	-11.4552	11.2679	11.2821	800.486
-3.59761	5	19.8455	19.1968	11.3486	801.398	11.2754	13.3514	11.4555	11.3914	802.203			-4.65942	5	-14.5132	14.2806	11.2959	801.142	11.3129	-11.744	11.339	11.3224	801.427			-0.012295	5	19.8467	19.1973	11.3486	801.404	11.2884	13.3522	11.4537	11.3919	802.228			4.7865	5	12.369	12.236	11.262	800.456	11.0889	11.3856	11.2521	11.2638	800.488
-6.64848	5	-19.7443	19.1479	11.3464	801.418	11.1899	-13.2905	11.4188	11.3871	802.249			-5.03953	5	3.70833	10.0079	10.1747	801.142	11.4113	11.5526	11.2938	11.3004	801.43			2.03631	5	-19.7452	19.1482	11.3464	801.424	11.2673	-13.2923	11.4184	11.3875	802.274			4.30227	5	10.5802	10.5409	10.6067	800.456	10.7418	9.68622	9.9828	9.99054	800.488
-2.67804	5	20.2269	19.2187	11.3588	801.446	11.2742	13.205	11.3696	11.3819	802.3			-5.00293	5	10.4368	10.4186	10.5458	801.141	11.1215	-11.3738	11.2565	11.247	801.43			3.79872	5	20.2273	19.2183	11.3588	801.452	11.2925	13.2123	11.3763	11.382	802.325			3.07903	5	10.0862	10.2414	10.4018	800.455	10.9758	10.9173	10.8778	10.8927	800.488
-3.65309	5	-20.5541	19.2676	11.3642	801.483	11.1573	-13.1364	11.2834	11.3845	802.358			-5.4273	5	2.11577	8.53959	8.68076	801.141	10.3781	8.81481	10.4413	10.4388	801.43			2.34121	5	-20.5543	19.2673	11.3642	801.49	11.2648	-13.1271	11.2739	11.3845	802.383			3.89351	5	12.8921	12.7317	11.2732	800.457	11.0933	11.4051	11.257	11.2695	800.489
-1.55425	5	20.0831	19.164	11.3568	801.521	11.2708	12.8926	11.3095	11.3658	802.414			-6.68094	5	9.28026	9.25399	9.33736	801.141	10.8073	10.7738	10.752	10.7518	801.43			0.634346	5	20.083	19.164	11.3568	801.527	11.3052	12.8797	11.2999	11.3657	802.44			3.69608	5	-13.5154	13.3267	11.2826	800.46	11.187	-11.5233	11.2876	11.2941	800.492
-1.46749	5	-19.6886	19.1239	11.345	801.559	10.717	-11.7224	11.336	11.3216	802.469			-5.83397	5	12.9085	12.7473	11.2746	801.142	11.2672	11.3982	11.2587	11.2671	801.432			2.0025	5	-19.689	19.1243	11.345	801.566	11.2309	-11.7191	11.3368	11.3211	802.496			4.11752	5	12.4551	12.3194	11.2644	800.462	11.1046	11.456	11.2856	11.2747	800.494
-0.841848	5	15.1838	14.9371	11.3045	801.594	10.7207	-11.7343	11.4421	11.3034	802.522			-7.53618	5	-13.6135	13.4205	11.285	801.145	11.1906	-11.5248	11.2851	11.2966	801.435			2.79887	5	15.183	14.9363	11.3045	801.601	11.2328	-11.7836	11.4804	11.3058	802.549			4.85895	5	-12.0486	11.9367	11.2524	800.463	11.1742	-11.388	11.2508	11.2658	800.496
0.457236	5	6.23744	11.0203	11.1778	801.626	11.2633	12.4519	11.3687	11.3531	802.575			-5.30926	5	16.0737	15.7824	11.3106	801.152	11.4284	11.5702	11.2916	11.3042	801.441			2.74635	5	6.27402	11.02	11.1777	801.633	11.3268	12.4717	11.3582	11.3535	802.602			7.18831	5	-11.1594	11.0716	10.8423	800.463	11.1054	-10.6773	10.5995	10.5873	800.496
-0.656518	5	-20.0182	19.4081	11.3476	801.658	11.2091	-13.3926	11.5354	11.3852	802.631			-4.76389	5	-19.232	18.8271	11.3314	801.164	11.3643	-11.8235	11.3478	11.3294	801.452			1.61367	5	-20.0197	19.4089	11.3477	801.664	11.2687	-13.3913	11.5315	11.3859	802.658			6.4348	5	-14.9318	14.6834	11.2991	800.468	11.1913	-11.5703	11.2865	11.3039	800.501
-1.16293	5	20.7845	19.3634	11.368	801.691	11.2761	13.4305	11.5006	11.3992	802.69			-3.72805	5	14.8818	14.6394	11.3008	801.172	11.5144	11.6571	11.3256	11.3128	801.46			2.17638	5	20.7845	19.3628	11.3681	801.698	11.2863	13.4329	11.501	11.3997	802.717			5.38483	5	14.938	14.69	11.3001	800.473	11.1314	11.5836	11.3183	11.2997	800.506
-2.7347	5	-20.7615	19.3331	11.3679	801.721	11.2144	-13.4229	11.4834	11.4013	802.747			-5.16288	5	-14.6666	14.4334	11.2978	801.18	11.1986	-11.5408	11.2671	11.3038	801.47			4.3228	5	-20.7619	19.3327	11.368	801.728	11.2691	-13.4261	11.4845	11.4019	802.774			5.88597	5	-8.98354	10.8957	11.0791	800.474	11.148	-11.121	11.0842	11.0924	800.508
-2.6621	5	20.9444	19.3533	11.3746	801.755	11.2759	13.4135	11.4505	11.4069	802.807			-5.86938	5	15.288	15.0303	11.3046	801.19	11.39	11.5305	11.2627	11.3028	801.48			4.46046	5	20.9444	19.353	11.3747	801.761	11.2868	13.4126	11.4488	11.4072	802.835			7.56929	5	-11.9928	11.8846	11.2505	800.475	11.1719	-11.3637	11.2533	11.2364	800.509
-3.00443	5	-20.8087	19.3235	11.3697	801.786	11.1962	-13.3231	11.4044	11.3969	802.866			-6.51981	5	-9.06982	11.0071	11.1696	801.196	10.8988	-9.42447	11.1239	11.1144	801.488			2.04597	5	-20.8097	19.3241	11.3697	801.792	11.268	-13.3409	11.4204	11.3973	802.894			4.45865	5	-12.9425	12.7808	11.2745	800.477	11.1788	-11.4356	11.2799	11.2687	800.511
-2.13916	5	20.4349	19.2739	11.3622	801.815	11.2745	13.2449	11.3727	11.3882	802.924			-7.14309	5	7.19665	10.9453	11.1199	801.2	7.76834	1.08726	11.015	11.0392	801.495			1.93186	5	20.4358	19.2739	11.3622	801.822	11.2915	13.2439	11.3712	11.3883	802.952			3.07842	5	18.9564	18.5648	11.3288	800.488	11.1484	11.6692	11.2877	11.3184	800.52
-1.59793	5	-19.906	19.1983	11.3514	801.844	11.1204	-12.9825	11.3003	11.3719	802.981			-8.18838	5	13.7792	13.5649	11.2864	801.204	11.5088	11.6516	11.3584	11.3062	801.502			3.75404	5	-19.9067	19.1984	11.3515	801.851	11.2623	-12.9795	11.2971	11.372	803.009			3.8748	5	-13.1212	12.954	11.278	800.492	11.1855	-11.5074	11.2804	11.2924	800.524
0.863901	5	18.546	18.1676	11.3282	801.869	11.2384	11.7432	11.2409	11.3343	803.034			-6.03583	5	1.6707	10.7597	10.9404	801.205	11.1489	-11.4369	11.2674	11.2782	801.506			3.7148	5	18.5493	18.1708	11.3283	801.875	11.3781	11.7379	11.2425	11.3338	803.062			6.6914	5	-6.75405	10.7128	10.8929	800.494	10.0609	-2.18732	10.9832	10.9724	800.527
-0.05744	5	-18.871	18.4894	11.3306	801.895	10.6896	-11.6341	11.2611	11.3218	803.086			-5.43262	5	-14.325	14.1025	11.2939	801.209	11.1067	-11.3379	11.2314	11.2191	801.51			1.6191	5	-18.8723	18.4907	11.3306	801.901	11.2283	-11.6238	11.2561	11.3212	803.115			6.71978	5	-15.3623	15.0982	11.3032	800.5	11.1891	-11.5466	11.274	11.3021	800.533
0.313221	5	13.786	13.6024	11.2908	801.919	10.8317	-12.0672	11.5001	11.3396	803.136			-5.97208	5	11.1446	11.1174	11.1842	801.211	11.0544	-11.1969	11.0185	10.9988	801.512			3.29155	5	13.7845	13.6009	11.2908	801.925	11.2398	-12.0331	11.4493	11.3408	803.165			7.05789	5	13.1748	13.0048	11.2789	800.504	11.1041	11.4541	11.2599	11.2847	800.538
-1.0862	5	4.19963	10.979	11.1543	801.94	11.272	12.9898	11.4621	11.3647	803.187			-5.83987	5	12.0872	11.964	11.2458	801.211	11.3915	11.532	11.2889	11.2974	801.515			4.95434	5	4.23524	10.9788	11.1542	801.947	11.3007	12.9866	11.4415	11.3654	803.216			8.56733	5	-12.1258	12.0121	11.2559	800.507	11.1702	-11.3465	11.2381	11.2243	800.542
-3.13251	5	-11.7994	11.6404	11.1168	801.96	11.1362	-13.046	11.3436	11.3734	803.237			-6.51509	5	-11.22	11.1554	11.0763	801.212	11.1618	-11.4649	11.2703	11.2859	801.517			4.59208	5	-11.8095	11.6496	11.1173	801.966	11.2638	-13.0618	11.357	11.3735	803.266			10.1462	5	-13.8869	13.6772	11.2874	800.51	11.1821	-11.4706	11.2684	11.2862	800.545
-1.71892	5	19.6035	19.062	11.3434	801.981	11.2761	13.4307	11.5163	11.3967	803.291			-6.04114	5	12.0157	11.9037	11.2516	801.212	11.3158	11.4516	11.2767	11.2791	801.52			2.4837	5	19.606	19.0642	11.3434	801.987	11.2865	13.4267	11.5104	11.3973	803.321			8.12717	5	-11.2009	11.1597	11.184	800.511	11.0159	-8.76755	11.0007	10.9931	800.547
-1.75316	5	-20.3207	19.2923	11.3603	802.005	11.2118	-13.4077	11.4571	11.4048	803.349			-5.23666	5	-11.9814	11.8729	11.2506	801.213	11.1581	-11.4571	11.2676	11.2845	801.523			3.91646	5	-20.3207	19.2915	11.3604	802.011	11.2689	-13.4098	11.4578	11.4051	803.378			6.38831	5	14.8801	14.6338	11.2996	800.516	11.1243	11.5489	11.3118	11.2937	800.551
2.46872	5	20.1215	19.1982	11.3578	802.027	11.2759	13.4048	11.4615	11.4032	803.405			-5.26027	5	-10.884	10.8345	10.8372	801.213	10.6031	7.31744	10.9221	10.9186	801.524			4.40733	5	20.1224	19.1982	11.3578	802.033	11.2872	13.3966	11.4515	11.4037	803.435			5.67585	5	11.7934	11.6746	10.9214	800.516	11.0753	11.3258	11.2388	11.2361	800.552
0.752349	5	-20.8925	19.322	11.3739	802.062	11.2095	-13.3949	11.4087	11.4138	803.473			-5.42494	5	-0.918651	8.95363	9.10218	801.213	11.5522	6.0043	10.2456	10.2444	801.523			4.8674	5	-20.8933	19.3226	11.3739	802.069	11.2687	-13.3943	11.408	11.4138	803.503			4.9477	5	10.1107	10.844	11.0162	800.516	10.7777	8.53678	10.9832	10.9808	800.553
1.50843	5	20.9417	19.3855	11.373	802.1	11.2744	13.2343	11.3189	11.3973	803.542			-6.57824	5	2.04886	7.56893	7.69261	801.213	8.08642	1.80322	8.37821	8.37827	801.523			4.44053	5	20.9427	19.3863	11.373	802.107	11.2917	13.2377	11.3222	11.3974	803.572			5.06967	5	11.855	11.7525	11.2428	800.517	11.0851	11.3685	11.2483	11.2578	800.553
-1.32819	5	-20.4015	19.2866	11.3616	802.138	11.1635	-13.1642	11.3133	11.386	803.61			-11.1082	5	12.9145	12.7531	11.2749	801.214	11.2613	11.3916	11.2618	11.2613	801.524			5.74348	5	-20.4018	19.2862	11.3616	802.144	11.2654	-13.1655	11.3151	11.3859	803.64			6.45895	5	-10.6431	10.7505	10.9291	800.517	11.1572	-11.2137	11.1892	11.1934	800.553
-2.08781	5	20.1861	19.1572	11.3602	802.18	11.2728	13.0626	11.3066	11.3776	803.679			-9.1469	5	19.43	19.0166	11.3328	801.225	11.6199	11.7606	11.3459	11.3235	801.533			4.75751	5	20.1863	19.1573	11.3602	802.186	11.2981	13.0534	11.3006	11.3775	803.709			9.98498	5	-13.2978	13.1178	11.2805	800.519	11.1786	-11.4333	11.2626	11.2774	800.555
-3.09061	5	-18.6783	18.3264	11.3303	802.216	10.6337	-11.4405	11.2079	11.3003	803.744			-11.8655	5	-19.5852	19.1036	11.339	801.241	11.3563	-11.8115	11.2949	11.333	801.547			4.77623	5	-18.6779	18.326	11.3303	802.222	11.2234	-11.4427	11.2147	11.2994	803.774			12.4756	5	-16.6361	16.3225	11.3137	800.525	11.1934	-11.5937	11.3046	11.3046	800.561
-1.83225	5	13.2414	13.1029	11.2851	802.25	10.8683	-12.1731	11.3806	11.3502	803.806			-8.90019	5	19.9097	19.1811	11.3512	801.263	12.1329	12.242	11.3298	11.348	801.566			4.74484	5	13.2404	13.1021	11.2851	802.256	11.2424	-12.1255	11.3176	11.3504	803.837			11.1696	5	-11.1982	11.1225	10.8812	800.526	11.0912	-10.5134	10.4449	10.4353	800.562
-1.98275	5	11.2709	11.1729	11.151	802.281	11.2735	13.1291	11.4863	11.3702	803.869			-6.85211	5	-19.9938	19.1701	11.3542	801.293	11.7555	-12.2951	11.3358	11.349	801.591			3.6991	5	11.2731	11.1747	11.151	802.288	11.2941	13.1654	11.51	11.3709	803.9			9.39872	5	13.7471	13.5468	11.287	800.528	11.1053	11.4595	11.2679	11.2835	800.564
0.159173	5	-19.5216	19.0915	11.3354	802.311	11.2118	-13.4076	11.5225	11.3921	803.933			-5.30867	5	17.4848	17.1498	11.3208	801.314	11.5824	11.7242	11.3124	11.3236	801.61			4.18695	5	-19.5235	19.0932	11.3354	802.318	11.2687	-13.3906	11.5036	11.3926	803.964			7.70514	5	12.0351	11.9225	11.2515	800.529	11.0868	11.3761	11.2515	11.2593	800.565
-0.42574	5	19.6196	19.1691	11.335	802.337	11.2746	13.2519	11.3219	11.4011	803.993			-6.16214	5	-15.6553	15.4009	11.3083	801.335	11.1884	-11.5205	11.2601	11.3017	801.629			7.32536	5	19.6283	19.1773	11.3351	802.344	11.2914	13.2495	11.32	11.4011	804.025			6.17035	5	13.1546	12.9815	11.2781	800.531	11.0957	11.416	11.2685	11.2674	800.567
-0.827093	5	-19.7135	19.1665	11.3471	802.361	11.1935	-13.3092	11.3599	11.4056	804.053			-8.31705	5	12.3907	12.2752	11.2667	801.353	11.2983	11.4325	11.2679	11.2766	801.648			6.18604	5	-19.7064	19.1593	11.3471	802.367	11.2676	-13.3149	11.3649	11.4057	804.085			5.19525	5	12.0186	11.9071	11.2509	800.532	11.0913	11.3963	11.2628	11.2597	800.567
0.251248	5	19.9459	19.2362	11.3515	802.384	11.2749	13.2881	11.3221	11.4097	804.112			-9.31689	5	19.3645	18.929	11.3321	801.371	11.7294	11.8652	11.375	11.3312	801.666			4.30167	5	19.9506	19.2406	11.3515	802.39	11.2903	13.2853	11.3197	11.4096	804.144			6.96189	5	11.3788	11.3147	11.2058	800.532	11.056	11.2435	11.2017	11.2062	800.568
-1.74784	5	-20.2015	19.233	11.359	802.408	11.1886	-13.2843	11.3227	11.4087	804.174			-12.0974	5	-18.787	18.3996	11.3291	801.386	11.3699	-11.8318	11.294	11.3347	801.683			5.53638	5	-20.2034	19.234	11.359	802.415	11.2672	-13.2858	11.3242	11.4087	804.206			8.82634	5	-14.6522	14.4146	11.2965	800.536	11.1928	-11.5877	11.3186	11.3006	800.572
-1.31226	5	20.6851	19.3455	11.3668	802.438	11.2749	13.2908	11.3315	11.4082	804.239			-9.31098	5	19.9739	19.2172	11.3521	801.407	12.5783	12.6784	11.3338	11.3569	801.705			5.84793	5	20.6854	19.3451	11.3668	802.444	11.2897	13.3043	11.3454	11.4081	804.271			10.913	5	-11.773	11.6717	11.236	800.537	11.1435	-11.0749	10.9852	10.979	800.572
-2.17163	5	-20.293	19.2762	11.3602	802.466	11.1794	-13.2389	11.3434	11.3945	804.302			-11.1643	5	-20.5923	19.3219	11.3639	801.436	12.5942	-12.9954	11.3596	11.3673	801.734			5.30272	5	-20.2942	19.2767	11.3602	802.473	11.2665	-13.2382	11.3428	11.3946	804.334			11.7468	5	-14.1878	13.97	11.2914	800.54	11.1911	-11.5685	11.2986	11.3012	800.576
-0.953991	5	19.864	19.1716	11.3518	802.494	11.2729	13.0747	11.3855	11.3744	804.363			-7.48896	5	20.6465	19.3018	11.3653	801.47	12.8868	13.0173	11.3457	11.3695	801.767			4.4997	5	19.8647	19.1721	11.3518	802.501	11.2973	13.0751	11.3834	11.3746	804.396			11.0778	5	8.28633	10.792	10.9635	800.54	11.0181	11.0874	11.0587	11.0667	800.576
-1.64514	5	-19.651	19.0877	11.3466	802.522	10.748	-11.819	11.3304	11.3351	804.423			-5.92605	5	-20.9234	19.3171	11.375	801.513	12.8736	-13.1995	11.3631	11.3813	801.808			5.26348	5	-19.652	19.0887	11.3466	802.529	11.2338	-11.8197	11.3316	11.335	804.456			10.8381	5	11.9045	11.8004	11.2461	800.541	11.0683	11.2958	11.2232	11.2269	800.577
-1.09801	5	19.1267	18.7301	11.3329	802.549	10.6213	-11.3942	11.221	11.2477	804.481			-5.09973	5	19.7825	19.085	11.3507	801.548	12.6233	12.7254	11.2896	11.3591	801.843			5.316	5	19.1281	18.7315	11.333	802.555	11.2239	-11.46	11.2784	11.2516	804.514			10.1776	5	2.09349	9.09333	9.24439	800.54	8.76681	1.97446	9.25968	9.25827	800.576
-0.460563	5	-13.3758	13.2079	11.2858	802.573	11.2651	12.534	11.3792	11.3577	804.538			-6.38288	5	-19.487	19.043	11.3365	801.58	11.6185	-12.1495	11.3318	11.3461	801.877			6.74634	5	-13.375	13.2071	11.2858	802.58	11.3239	12.5203	11.3587	11.358	804.571			7.31631	5	11.5093	11.4338	11.2201	800.54	11.0572	11.2487	11.2042	11.2091	800.576
-0.317729	5	-15.8273	15.4872	11.3089	802.594	11.1971	-13.328	11.4855	11.3861	804.597			-8.27514	5	14.7491	14.523	11.3007	801.612	11.3979	11.5386	11.2989	11.2967	801.91			7.25653	5	-15.8354	15.495	11.309	802.601	11.2679	-13.3296	11.4851	11.3866	804.63			6.44023	5	16.4617	16.1551	11.3125	800.547	11.1361	11.6068	11.318	11.3043	800.582
-0.380883	5	19.1108	18.6782	11.3321	802.614	11.275	13.2936	11.3825	11.3981	804.657			-9.65568	5	19.4388	19.0045	11.3333	801.64	11.7986	11.9303	11.3204	11.3387	801.942			5.61608	5	19.1173	18.6845	11.3322	802.621	11.2901	13.2908	11.3794	11.3983	804.69			8.93985	5	-12.4642	12.3279	11.265	800.549	11.1832	-11.4826	11.2892	11.2828	800.585
-0.562082	5	-19.6574	19.1503	11.344	802.633	11.1925	-13.3039	11.3565	11.406	804.716			-4.36254	5	-19.4444	19.002	11.3329	801.666	11.5002	-12.009	11.3728	11.3395	801.972			5.11616	5	-19.6547	19.1474	11.344	802.639	11.2678	-13.3283	11.3806	11.4061	804.75			11.0392	5	-15.2109	14.9491	11.3017	800.553	11.1854	-11.5065	11.2791	11.2925	800.588
